# Supplementary material for: Methionine in a protein hydrophobic core drives tight interactions required for assembly of spider silk
Source: Nat Commun. 2019 Sep 26;10:4378. doi: 10.1038/s41467-019-12365-5 (PMC6763431; doi:10.1038/s41467-019-12365-5)
Supplement: Supplementary file 1 — Supplementary Information [file 41467_2019_12365_MOESM1_ESM.pdf]

# Supplementary Information

## **Methionine in a protein hydrophobic core drives tight interactions required for assembly of spider silk**

**Julia C. Heiby<sup>1,5</sup>, Benedikt Goretzki<sup>2,3,5</sup>, Christopher M. Johnson<sup>4</sup>, Ute A. Hellmich<sup>2,3,\*</sup> & Hannes Neuweiler<sup>1,\*</sup>**

<sup>1</sup>Department of Biotechnology & Biophysics, Julius-Maximilians-University Würzburg, Am Hubland, 97074 Würzburg, Germany.

<sup>2</sup>Institute for Pharmacy and Biochemistry, Johannes-Gutenberg-University Mainz, Johann-Joachim Becherweg 30, 55128 Mainz, Germany;

<sup>3</sup>Center for Biomolecular Magnetic Resonance, Goethe-University, Max-von-Laue-Strasse 9, 60438 Frankfurt, Germany.

<sup>4</sup>Medical Research Council Laboratory of Molecular Biology, Francis Crick Avenue, Cambridge CB2 0QH, United Kingdom

<sup>5</sup>These authors contributed equally to this work.

\*Corresponding authors: U.A.H.: [u.hellmich@uni-mainz.de](mailto:u.hellmich@uni-mainz.de); H.N.: [hannes.neuweiler@uni-wuerzburg.de](mailto:hannes.neuweiler@uni-wuerzburg.de)

## Supplementary Tables

**Supplementary Table 1:** Structural statistics for the NMR solution structure of L6-NTD

|                                                        |                              |
|--------------------------------------------------------|------------------------------|
| <b>Conformational restricting restraints</b>           |                              |
| Total NOE distance restraints                          | 1673                         |
| intraresidue $ i - j $                                 | 448                          |
| sequential $ i - j  = 1$                               | 463                          |
| medium-range $1 <  i - j  < 5$                         | 347                          |
| long-range $ i - j  \geq 5$                            | 415                          |
| Dihedral angle restraints (Talos-N)                    | 216                          |
| No. of restraint per residue                           | 14.4                         |
| No. of long-range restraints per residue               | 3.2                          |
| <b>Residual restraint violations<sup>a</sup></b>       |                              |
| Average no. of distance violations per structure       |                              |
| 0.1-0.2 Å                                              | 6.95                         |
| 0.2-0.5 Å                                              | 0                            |
| >0.5 Å                                                 | 1                            |
| Average no. of dihedral angle violations per structure |                              |
| 1-10°                                                  | 4.4                          |
| >10°                                                   | 0                            |
| <b>Model quality (ordered residues)<sup>a</sup></b>    |                              |
| RMSD backbone atoms (Å)                                | 2.9                          |
| RMSD heavy atoms (Å)                                   | 2.9                          |
| RMSD bond lengths (Å)                                  | 0.02                         |
| RMSD bond angles (°)                                   | 0.25                         |
| <b>MolProbity Ramachandran statistics<sup>a</sup></b>  |                              |
| Most favored regions                                   | 98.4                         |
| Allowed regions                                        | 1.6                          |
| Disallowed regions                                     | 0                            |
| <b>Global quality scores (raw/Z score)<sup>a</sup></b> |                              |
| Verify3D                                               | 0.39                         |
| ProsaII                                                | 0.84                         |
| PROCHECK (φ-ψ)                                         | 0.47                         |
| PROCHECK (all)                                         | -0.11                        |
| MolProbity clash score                                 | 2.80                         |
| <b>Model contents</b>                                  |                              |
| Ordered residue ranges (HetNOE > 0.6)                  | 0-60, 63-82, 90-108, 110-129 |
| Total no. of residues                                  | 137                          |
| BMRB accession number                                  | 27683                        |
| PDB ID code                                            | 6QJY                         |

<sup>a</sup> calculated using Protein Structure Validation Software 1.5 for using ordered residues (HetNOE > 0.6). Average distance violations were calculated using the sum over  $r^{-6}$

## Supplementary Figures

### Supplementary Figure 1

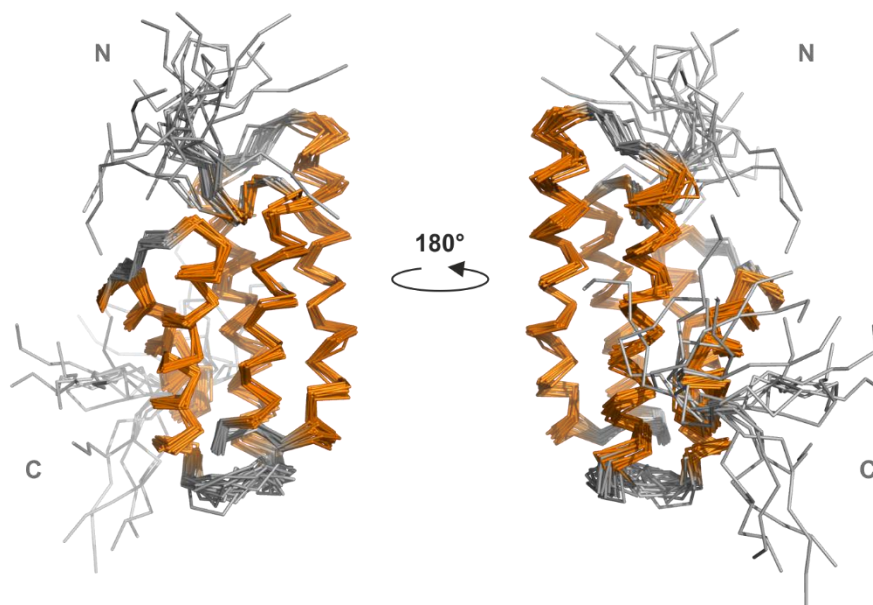

Structure bundle of L6-NTD determined by solution NMR spectroscopy. Alignment of the 20 lowest-energy conformers shown as backbone trace. The backbone heavy atom RMSD for the NMR structure bundle is 1.2 Å. Helices are highlighted orange. N- and C-terminus are indicated.

## Supplementary Figure 2

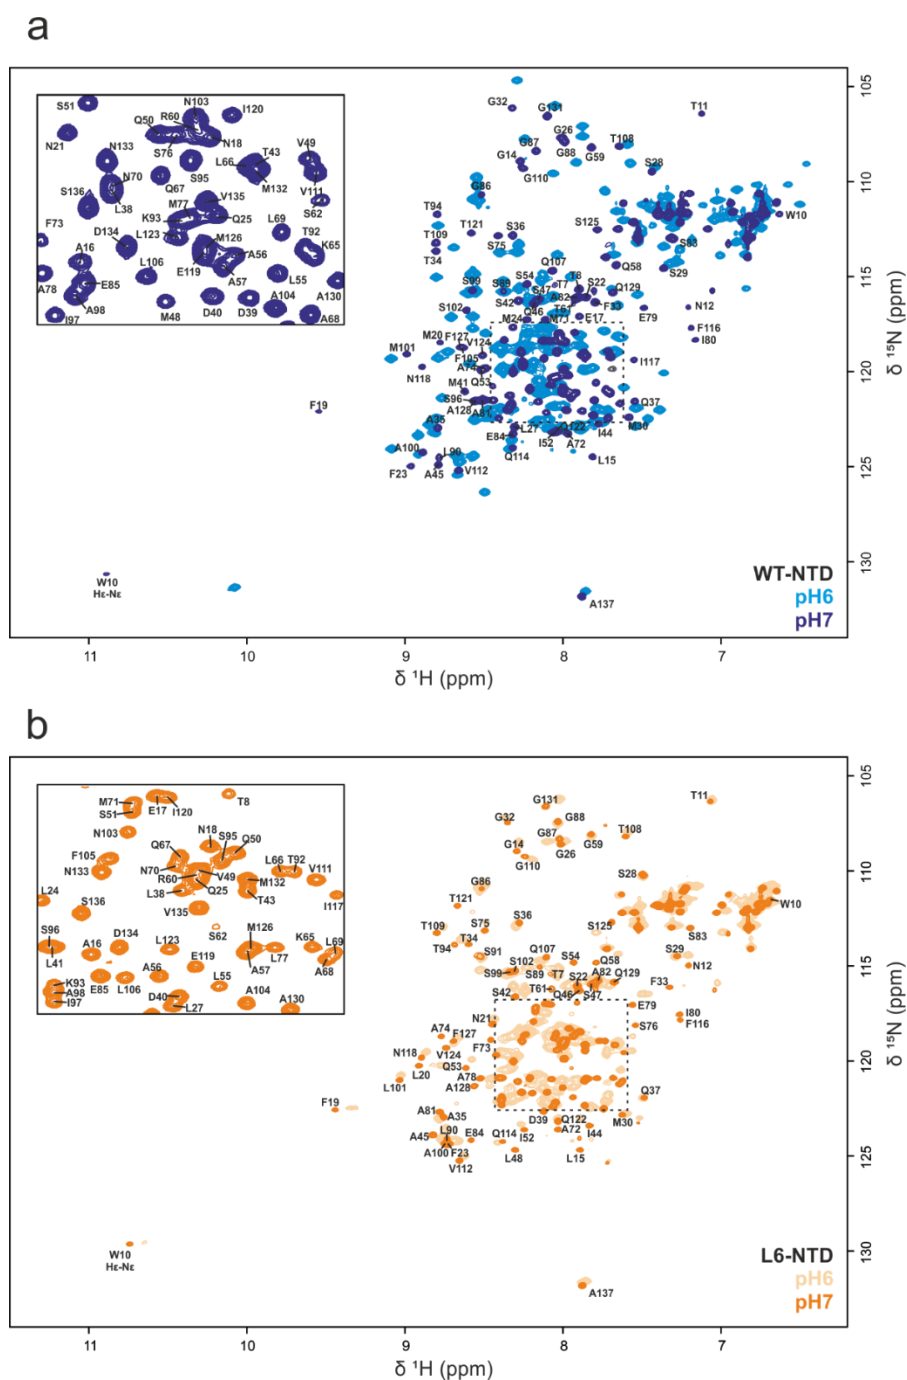

$^1\text{H}$ ,  $^{15}\text{N}$ -HSQC NMR spectra of WT-NTD and L6-NTD. **(a)** Spectra of WT-NTD recorded in pH 7.0 and 200 mM ionic strength (blue) and in pH 6.0 and 8 mM ionic strength (cyan). **(b)** Spectra of L6-NTD recorded in pH 7.0 and 200 mM ionic strength (orange) and in pH 6.0 and 8 mM ionic strength (light orange). Assignments for the spectra recorded under monomer conditions (pH 7.0) are indicated (source data are provided in the BMRB; entry 18262: WT-NTD; entry 27683: L6-NTD).
